# Supplementary material for: Production of a Chikungunya Vaccine Using a CHO Cell and Attenuated Viral-Based Platform Technology
Source: PubMed Central journal article supplement — Mol Ther. 2017 Jul 15;25(10):2332–44. doi: 10.1016/j.ymthe.2017.06.017 (PMC5628773; doi:10.1016/j.ymthe.2017.06.017), 2017-07-15
Supplement: mmc1.pdf [file mmc1.pdf]

**YMTHE, Volume 25**

## **Supplemental Information**

### **Production of a Chikungunya Vaccine**

#### **Using a CHO Cell and Attenuated**

#### **Viral-Based Platform Technology**

**Preethi Eldi, Tamara H. Cooper, Liang Liu, Natalie A. Prow, Kerrilyn R. Diener, Paul M. Howley, Andreas Suhrbier, and John D. Hayball**

## Supplemental Figures

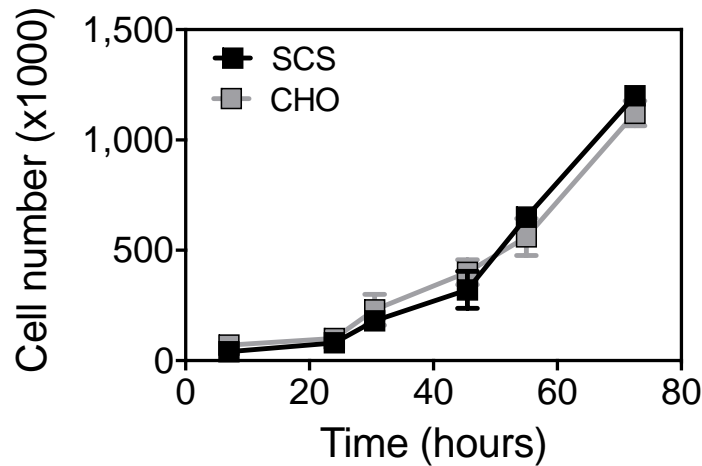

**Figure S1: Comparison of growth kinetics between parental CHO cells and the SCS.** Cells were plated at a seeding density of  $2 \times 10^4$  cells per well in a 6 well plate and at time-points indicated, cells were harvested and cell counts determined. No differences in the growth rate could be detected between the two cell lines. Data expressed as mean  $\pm$  SEM and is representative of two independent experiments.

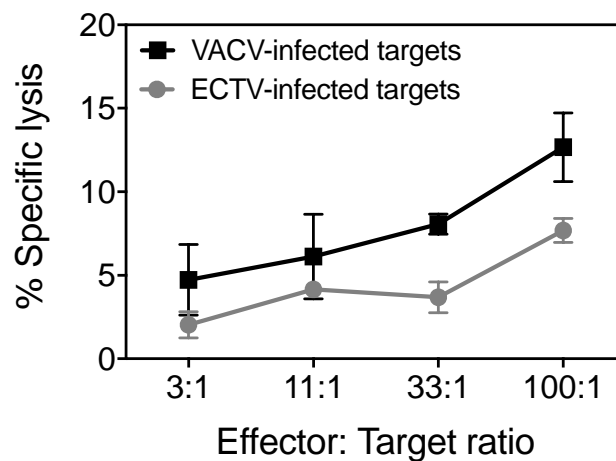

**Figure S2: Induction of virus-specific cytolytic CD8 T cell effector population post-vaccination.** BALB/c mice vaccinated with SCV-CHIK ( $10^7$  PFU) were sacrificed 8 days post-vaccination and virus-specific (VACV and ECTV cross-reactive) splenic cytolytic activity was determined *ex-vivo* by  $^{51}\text{Cr}$ -release assay. Data represented as mean percent specific lysis  $\pm$  SEM for indicated effector (splenocyte): target (radiolabelled, virus infected P815) cell ratio.

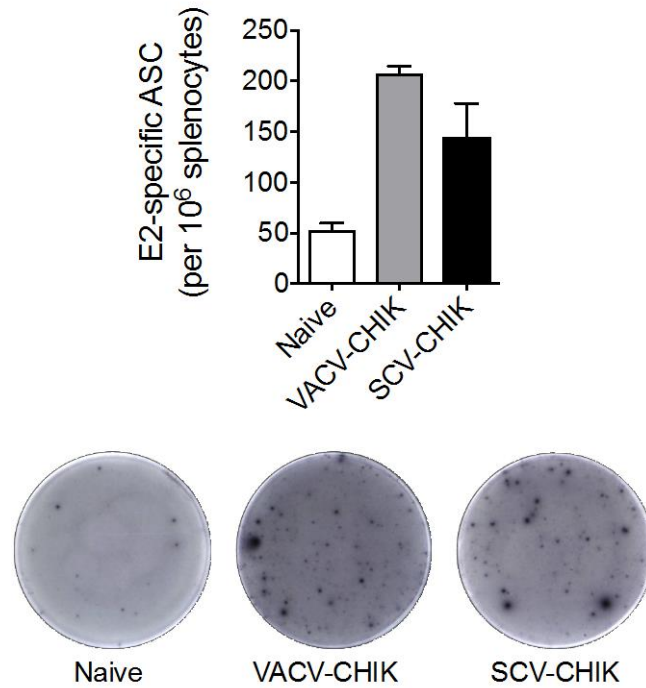

**Figure S3: Analysis of vaccine-induced CHIKV-E2 specific IgG producing antibody secreting cells 1 year post-vaccination.** Groups of C57BL/6 mice (n= 3 mice per group) were vaccinated with VACV-CHIK or SCV-CHIK at 10<sup>7</sup> PFU and the number of splenic CHIKV-E2 specific ASC were enumerated by ex-vivo ELISPOT assay one year post-vaccination. Data represented as mean ± SEM of E2-specific IgG producing ASC per million cells. A representative well image from each group is included.

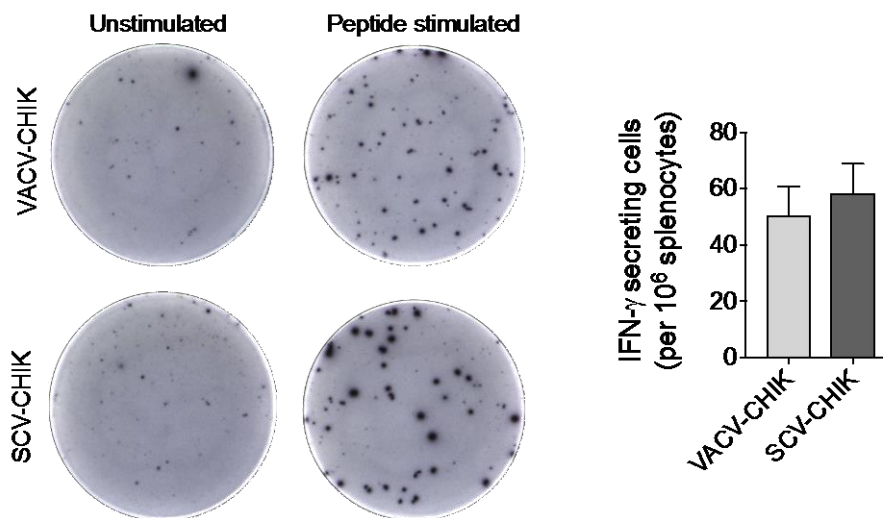

**Figure S4: Analysis of vaccine-induced IFN-γ secreting cells by ELISPOT.** Groups of C57BL/6 mice (n= 3 mice per group) were vaccinated with VACV-CHIK or SCV-CHIK at 10<sup>7</sup> PFU and the number of CHIKV-Capsid/ E2 and E1-specific IFN-γ secreting cells were enumerated by ex-vivo IFN-γ ELISPOT assay one year post-vaccination. Data represented as mean ± SEM of IFN-γ secreting cells per million cells. A representative well image from each group is included.

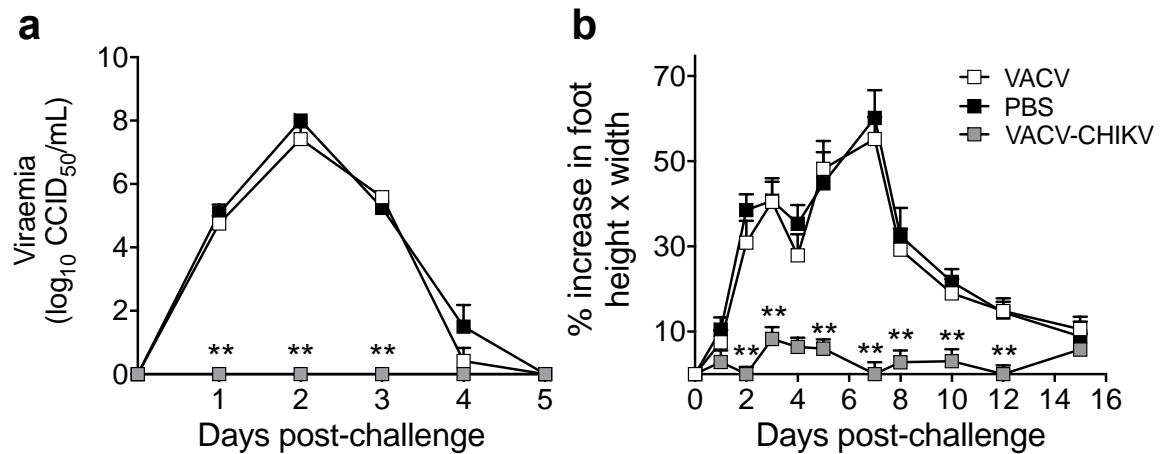

**Figure S5: Replication competent VACV-CHIK provides protection against CHIKV challenge.** Groups of 6-8 week old female C57BL/6 mice (n=6 mice per group) vaccinated with VACV ( $10^7$  PFU), VACV-CHIK ( $10^7$  PFU) or mock-vaccinated with PBS vehicle were challenged s.c. with CHIKV ( $10^4$  CCID<sub>50</sub>) into the ventral side of both hind feet. **(a)** Mice were bled at time-points indicated and viral titers determined by serial dilution of serum on C6/36 cells and expressed as log<sub>10</sub> CCID<sub>50</sub> per mL. Data expressed as mean  $\pm$  SEM and statistical analysis done using Kolmogorov-Smirnov test; \*\*p=0.005. **(b)** Post-challenge, the height and width of the perimetatarsal area of the hind feet was monitored using Kincrome digital vernier calipers, Data expressed as mean  $\pm$  SEM and statistical analysis performed using Mann-Whitney U-test; \*\* p $\leq$ 0.002.

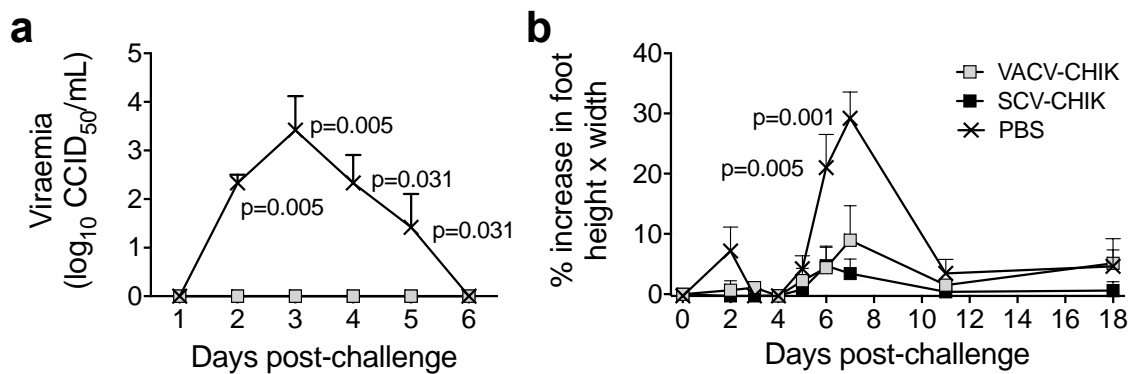

**Figure S6: Long-term protection against CHIKV challenge.** Groups of 6-8 week old female C57BL/6 mice (n=6 mice per group) vaccinated with SCV-CHIK ( $10^7$  PFU), VACV-CHIK ( $10^7$  PFU) or mock-vaccinated with PBS vehicle were challenged s.c. with CHIKV ( $10^4$  CCID<sub>50</sub>) 1 year post-vaccination. **(a)** Mice were bled at time-points indicated and viral titers determined by serial dilution of serum on C6/36 cells and expressed as log<sub>10</sub> CCID<sub>50</sub> per mL. Data expressed as mean  $\pm$  SEM and statistical analysis done using Kolmogorov-Smirnov test. **(b)** Post-challenge, the height and width of the perimetatarsal area of the hind feet was monitored using Kincrome digital vernier calipers. Data expressed as mean  $\pm$  SEM and statistical analysis performed using Mann-Whitney U test.

## Supplemental Tables

**Table S1: Viral load in VACV and SCV-CHIK infected SCID mice.**

|        | Ovary |          | Spleen |          | Liver |          | Lungs |          | Heart |          |
|--------|-------|----------|--------|----------|-------|----------|-------|----------|-------|----------|
|        | VACV  | SCV-CHIK | VACV   | SCV-CHIK | VACV  | SCV-CHIK | VACV  | SCV-CHIK | VACV  | SCV-CHIK |
| Day 1  | ++    | -        | +      | -        | ++    | -        | +     | -        | +     | -        |
| Day 2  | ++++  | -        | +++    | -        | ++    | -        | +     | -        | +     | -        |
| Day 3  | ++++  | -        | ++     | -        | ++    | -        | ++    | -        | +     | -        |
| Day 5  | ++++  | -        | +++    | -        | ++    | -        | ++    | -        | ++    | -        |
| Day 10 | ++++  | -        | +++    | -        | ++    | -        | +++   | -        | ++    | -        |
| Day 14 | ++++  | -        | +      | -        | +     | -        | +++   | -        | +     | -        |

Groups of 6-8 week old female SCID mice (n=3 mice per group) infected with  $10^7$  PFU of VACV or SCV-CHIK as indicated in Fig. 4 were humanely killed at time-points indicated and organs harvested. Viral load in the organs was determined by viral plaque assay and presented as mean PFU/organ:  $1-10^2$  PFU (+);  $10^2-10^4$  PFU (++);  $10^4-10^6$  PFU (+++);  $> 10^6$  PFU (++++); no plaques detected (-).

**Table S2: Viral load in SCV-CHIK and VACV-CHIK vaccinated mice following lethal ECTV challenge.**

|                         | Liver | Spleen | Lungs | Lymph node | Ovary |
|-------------------------|-------|--------|-------|------------|-------|
| Mock-vaccinated (PBS)   | +++   | +++    | ++    | ++         | ++    |
| VACV-CHIK ( $10^7$ PFU) | -     | -      | -     | -          | -     |
| SCV-CHIK ( $10^5$ PFU)  | -     | -      | -     | -          | -     |
| SCV-CHIK ( $10^6$ PFU)  | -     | -      | -     | -          | -     |
| SCV-CHIK ( $10^7$ PFU)  | -     | -      | -     | -          | -     |

Groups of 6-8 weeks old ECTV-susceptible BALB/c mice (n=5 mice per group) were vaccinated with VACV-CHIK ( $10^7$  PFU), SCV-CHIK ( $10^5$ ,  $10^6$ ,  $10^7$  PFU) or mock-vaccinated with PBS vehicle as indicated in Fig. 5. Four weeks post-vaccination, mice were challenged with a lethal dose ( $50 LD_{50}$ ) of ECTV subcutaneously and monitored for 14 days. Viral load was determined by plaque assay from organs collected either at euthanasia (PBS mock-vaccinated group) or at the end of the 14-day monitoring period. Data presented as mean PFU/organ:  $10^2-10^4$  PFU (++);  $10^4-10^6$  PFU (+++); no plaques detected (-).

## **Supplemental Methods**

### **E2-specific ASC ELISPOT**

ELISPOT plates (MSIPS4510; Millipore) pre-wetted with 35% ethanol for  $\leq$  1min were washed with sterile water and coated overnight at 4°C with 1 $\mu$ g per well of E2 in PBS. The plates were washed with PBS and blocked with RPMI-1640 supplemented with 10% FBS and 50 $\mu$ M 2-mercaptoethanol for 1 hr at 37 °C. Two-fold serial dilution of cells were added to the plates and incubated for 24 hrs at 37 C, 5% CO<sub>2</sub>. Subsequently, plates were washed with PBS-T and incubated with biotinylated anti-IgG detection Ab (1 $\mu$ g/ml in PBS-T; Mabtech) for 2h at RT. Following washes, the plates were incubated with Streptavidin-Alkaline phosphate (1:1000; Mabtech) for 1.5 hrs at RT. E2-specific ASCs were visualised using BCIP/NBT-plus substrate (100 $\mu$ l per well; Mabtech). Spots were counted using an AID ELISPOT classic reader (Autoimmun Diagnostika).

### **IFN- $\gamma$ ELISPOT**

ELISPOT plates (MSIPS4510; Millipore) pre-wetted with 35% ethanol for  $\leq$  1min were washed with sterile water and coated overnight at 4°C with 10 $\mu$ g per well of anti- IFN- $\gamma$  Ab (clone AN-18) in PBS. The plates were washed with PBS and blocked with RPMI-1640 supplemented with 10% FBS and 50 $\mu$ M 2-mercaptoethanol for 1 hr at 37°C. Two-fold serial dilution of cells were added to the plates and stimulated with 10 $\mu$ M of H2-Kb-restricted CHIKV E1-specific (HSMTNAVTI), E2-specific (IILYYYELY) and capsid-specific (ACLVGDKVM) peptides for 20 hrs at 37°C, 5% CO<sub>2</sub>. Subsequently, plates were washed with PBS-T and incubated with biotinylated anti-mouse IFN- $\gamma$  Ab (clone R4-6A2; 1 $\mu$ g/ml in PBS-T; Mabtech) for 2h at RT. Following washes, the plates were incubated with Streptavidin-Alkaline phosphate (1:1000; Mabtech) for 1.5 hrs at RT. IFN- $\gamma$  secreting cells were visualised using BCIP/NBT-plus substrate (100 $\mu$ l per well; Mabtech). Spots were counted using an AID ELISPOT classic reader (Autoimmun Diagnostika).

### **Cytotoxic T-lymphocyte (CTL) assay**

*Ex vivo* VACV and ECTV specific CTL responses were measured in SCV-CHIK vaccinated mice using <sup>51</sup>Chromium-labelled virus infected P815 target cells as described elsewhere<sup>1</sup>. The percent specific lysis was determined using the equation: [(Sample <sup>51</sup>Cr release – Spontaneous <sup>51</sup>Cr release)/(Maximum <sup>51</sup>Cr release – Spontaneous <sup>51</sup>Cr release)]  $\times$ 100. Percent specific lysis of uninfected target cells was subtracted from infected target cells to calculate the virus specific CTL activity.

## **Supplemental References**

1. Shen, X, Wong, SB, Buck, CB, Zhang, J, and Siliciano, RF (2002). Direct priming and cross-priming contribute differentially to the induction of CD8+ CTL following exposure to vaccinia virus via different routes. *J Immunol* **169**: 4222-4229
